# Supplementary material for: Predictive modeling of morbidity and mortality in COVID-19 hospitalized patients and its clinical implications
Source: bioRxiv or medRxiv preprint supplement (doi:10.1101/2020.12.02.20235879), 2021-03-29
Supplement: Supplementary file [file media-4.pdf]

# Supplemental Figure 1

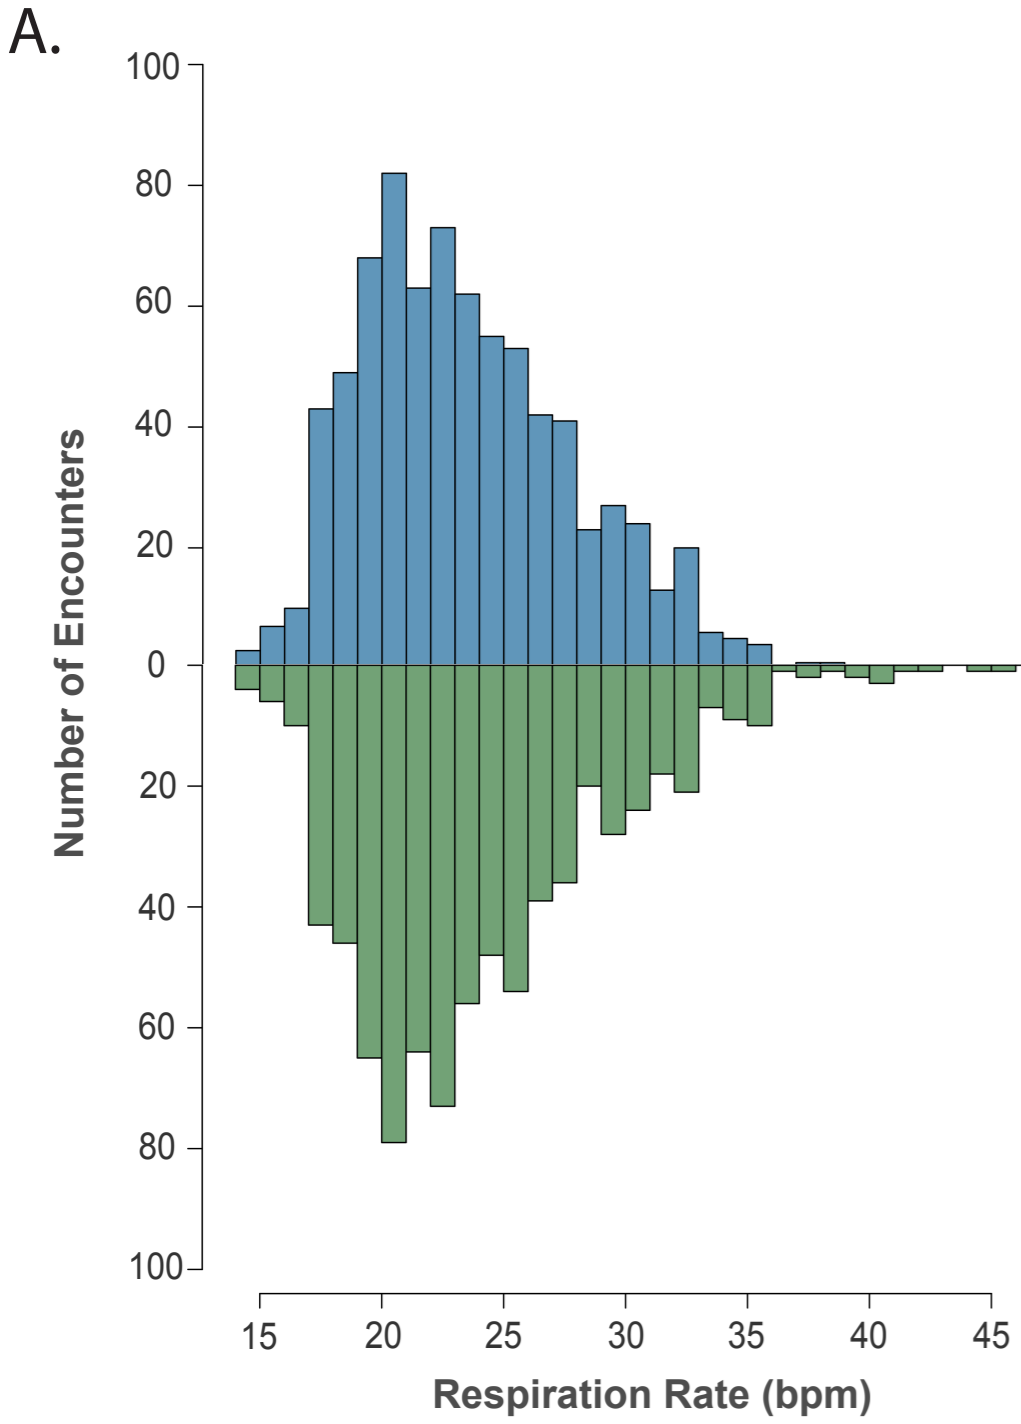

| Respiration Rate (bpm) | Mean (bpm) | SD (bpm) |
|------------------------|------------|----------|
| All                    | 23.63      | 4.35     |
| Filtered Subset        | 24.12      | 5.08     |

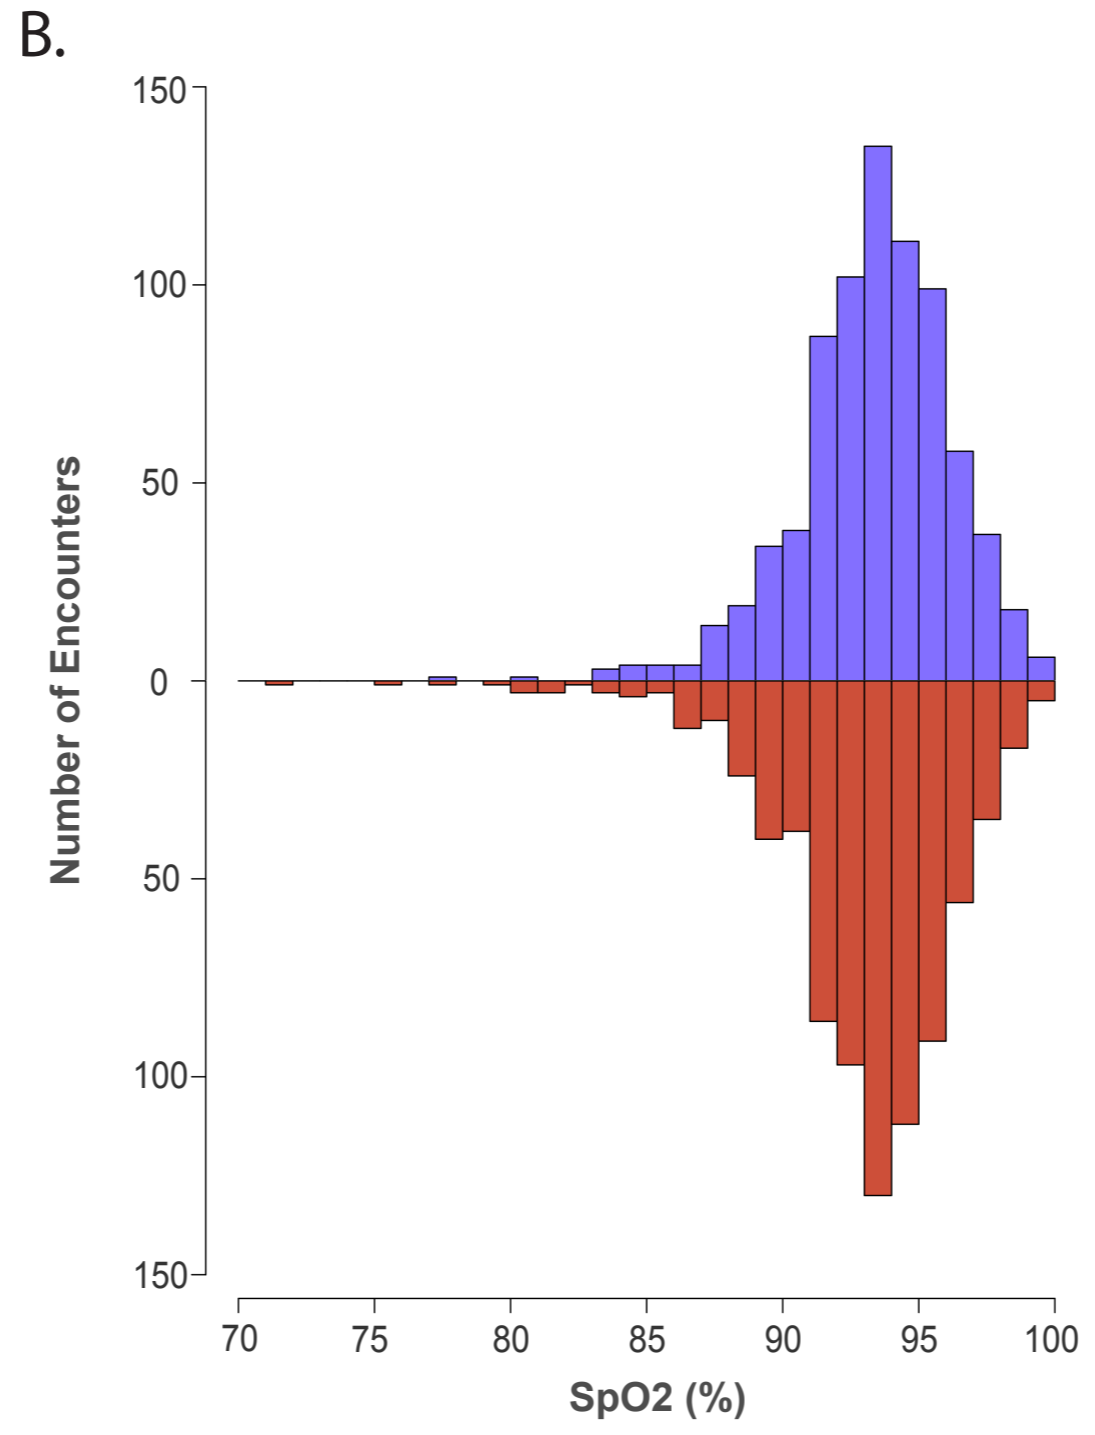

| SpO2 (%)        | Mean (%) | SD (%) |
|-----------------|----------|--------|
| All             | 93.47    | 2.78   |
| Filtered Subset | 93.16    | 3.23   |
